# Supplementary material
Source: HighWire-hosted journal article supplement (https://bmjopengastro.bmj.com/highwire/filestream/2172/field_highwire_adjunct_files/0/bmjgast-2021-000648supp001_data_supplement.pdf)
Supplement: bmjgast-2021-000648supp001_data_supplement.pdf [file bmjgast-2021-000648supp001_data_supplement.pdf]

### Supplementary table 1: Stages of hepatic encephalopathy according to the Hepatic Encephalopathy Scoring Algorithm (HESA)

|                                                                                                                                                                                                                                                                                                                                                                                                                      |
|----------------------------------------------------------------------------------------------------------------------------------------------------------------------------------------------------------------------------------------------------------------------------------------------------------------------------------------------------------------------------------------------------------------------|
| Time  __ __  : __ __  24 Hour Clock                                                                                                                                                                                                                                                                                                                                                                                  |
| <ul style="list-style-type: none"> <li>○ No eyes opening</li> <li>○ No verbal/voice response</li> <li>○ No reaction to simple commands</li> </ul>                                                                                                                                                                                                                                                                    |
| <b>All applicable= grade 4; otherwise continue examination</b>                                                                                                                                                                                                                                                                                                                                                       |
| <ul style="list-style-type: none"> <li>○ Somnolence</li> <li>○ Confusion</li> <li>○ Disoriented to place</li> <li>○ Bizarre Behavior / Anger/Rage</li> <li>○ Clonus/Rigidity / Nysatgmus / Babinsky</li> </ul> <p style="margin-left: 40px;"><input type="checkbox"/> Mental Control = 0</p>                                                                                                                         |
| <b>3 or more applicable=grade 3; otherwise continue examination</b>                                                                                                                                                                                                                                                                                                                                                  |
| <ul style="list-style-type: none"> <li>○ Lethargy</li> <li>○ Loss of time</li> <li>○ Slurred Speech</li> <li>○ Hyperactive Reflexes</li> <li>○ Inappropriate Behavior</li> </ul> <p style="margin-left: 40px;"> <input type="checkbox"/> Slow Responses<br/> <input type="checkbox"/> Anxiety<br/> <input type="checkbox"/> Amnesia of recent events<br/> <input type="checkbox"/> Impaired Simple Computations </p> |
| <b>2 or more ○ and 3 or more □ applicable = grade 2; otherwise continue examination</b>                                                                                                                                                                                                                                                                                                                              |
| <ul style="list-style-type: none"> <li>○ Sleep disorder / Impaired Sleep Pattern</li> <li>○ Tremor</li> </ul> <p style="margin-left: 40px;"> <input type="checkbox"/> Impaired complex computations<br/> <input type="checkbox"/> Shortened attention span<br/> <input type="checkbox"/> Impaired Construction ability<br/> <input type="checkbox"/> Euphoria or Depression </p>                                     |
| <b>4 or more applicable=grade 1; otherwise= grade 0</b>                                                                                                                                                                                                                                                                                                                                                              |

Adopted from Córdoba J. New assessment of hepatic encephalopathy. J Hepatol.
